# Supplementary material for: Alcohol Consumption and a Decline in Glomerular Filtration Rate: The Japan Specific Health Checkups Study
Source: MDPI journal article supplement (doi:10.3390/nu15061540), 2023-03-22
Supplement: s1 [file s1]

---

*Article*

# Alcohol Consumption and a decline in glomerular filtration rate: the Japan Specific Health Checkups study

Yoshiki Kimura, Ryohei Yamamoto, Maki Shinzawa, Katsunori Aoki, Ryohei Tomi, Shingo Ozaki, Ryuichi Yoshimura, Akihiro Shimomura, Hirotsugu Iwatani, Yoshitaka Isaka, Kunitoshi Iseki, Kazuhiko Tsuruya, Shouichi Fujimoto, Ichiei Narita, Tsuneo Konta, Masahide Kondo, Masato Kasahara, Yugo Shibagaki, Koichi Asahi, Tsuyoshi Watanabe, Kunihiro Yamagata, and Toshiki Moriyama

---

## Supplementary materials

**Table S1.** Baseline characteristics of included and excluded men.

**Table S2.** Baseline characteristics of included and excluded women.

**Table S3.** Observational period and numbers of eGFR measurements.

**Table S4.** Difference in eGFR slope among alcohol consumption categories.

**Table S5.** Difference in eGFR slope among five categories of alcohol consumption (vs. occasional drinkers, mL/min/1.73 m<sup>2</sup>/year) in 125,698 men and 179,231 women.

**Table S6.** Alcohol consumption and incidence of  $\geq 30\%$  decline in eGFR in 125,698 men and 179,231 women.

**Table S7.** Baseline characteristics and outcomes of rare vs. occasional male drinkers (1:1) and rare vs. daily male drinkers with alcohol consumption of  $\geq 60$  g/day (4:1) matched by propensity score.

---

**Table S1.** Baseline characteristics of included and excluded men.

|                                  | Included       | Excluded       | Missing, N (%) |
|----------------------------------|----------------|----------------|----------------|
| Number                           | 125,698        | 325,377        |                |
| Age, year                        | 66 (59–69)     | 65 (57–69)     | 0 (0.0)        |
| BMI, kg/m <sup>2</sup>           | 23.8 ± 3.0     | 23.8 ± 3.1     | 3,514 (1.1)    |
| Current smokers, N (%)           | 33,018 (26.3)  | 95,469 (30.6)  | 13,125 (4.0)   |
| Drinking status                  |                |                | 54,327 (16.7)  |
| Rare drinkers, N (%)             | 38,726 (30.8)  | 83,238 (30.7)  |                |
| Occasional drinkers              | 32,774 (26.1)  | 67,479 (24.9)  |                |
| Daily drinkers ≤ 19 g/day        | 15,236 (12.1)  | 30,293 (11.2)  |                |
| 20–39                            | 25,819 (20.5)  | 55,885 (20.6)  |                |
| 40–59                            | 10,220 (8.1)   | 26,530 (9.8)   |                |
| ≥ 60                             | 2,923 (2.3)    | 7,625 (2.8)    |                |
| SBP, mmHg                        | 131 ± 17       | 132 ± 18       | 36,173 (11.1)  |
| DBP, mmHg                        | 78 ± 11        | 79 ± 11        | 36,266 (11.1)  |
| MAP, mmHg                        | 96 ± 12        | 97 ± 12        | 36,281 (11.2)  |
| HDL cholesterol, mg/dL           | 57 ± 15        | 57 ± 15        | 245 (0.1)      |
| Hemoglobin A1c, %                | 5.4 ± 0.8      | 5.4 ± 0.9      | 17,574 (5.4)   |
| Uric acid, mg/dL                 | 6.0 ± 1.3      | 6.0 ± 1.4      | 115,961 (35.6) |
| eGFR, ml/min/1.73 m <sup>2</sup> | 73 (64–84)     | 74 (65–85)     | 74,109 (22.8)  |
| ≥ 90, N (%)                      | 15,216 (12.1)  | 39,502 (15.7)  |                |
| 60–89                            | 87,663 (69.7)  | 171,168 (68.1) |                |
| 45–59                            | 20,393 (16.2)  | 35,233 (14.0)  |                |
| < 45                             | 2,426 (1.9)    | 5,365 (2.1)    |                |
| Dipstick UP, -, N (%)            | 103,995 (82.7) | 267,903 (83.3) | 3,722 (1.1)    |
| ±                                | 12,374 (9.8)   | 28,497 (8.9)   |                |
| 1+                               | 6,203 (4.9)    | 16,620 (5.2)   |                |
| 2+                               | 2,390 (1.9)    | 6,414 (2.0)    |                |
| ≥ 3+                             | 736 (0.6)      | 2,221 (0.7)    |                |
| Hypertension, N (%)              | 39,389 (31.3)  | 100,990 (31.8) | 7,570 (2.3)    |
| Dyslipidemia, N (%)              | 12,929 (10.3)  | 34,364 (10.8)  | 8,182 (2.5)    |
| Diabetes, N (%)                  | 8,548 (6.8)    | 24,901 (7.9)   | 8,350 (2.6)    |
| CVD history, N (%)               | 13,825 (11.0)  | 32,727 (12.0)  | 51,814 (15.9)  |

Mean ± SD; Median (25%–75%)

BMI, body mass index; CVD, cardiovascular disease; DBP, diastolic blood pressure; eGFR, estimated glomerular filtration rate; HDL, high density lipoprotein; MAP, mean arterial pressure; SBP, systolic blood pressure; UP, urinary protein.

**Table S2.** Baseline characteristics of included and excluded women.

|                                  | Included        | Excluded       | Missing, N (%) |
|----------------------------------|-----------------|----------------|----------------|
| Number                           | 179,231         | 440,740        |                |
| Age, year                        | 65 [59–69]      | 64 [58–69]     | 0 (0.0)        |
| BMI, kg/m <sup>2</sup>           | 22.9 ± 3.4      | 22.9 ± 3.5     | 4,556 (1.0)    |
| Current smokers, N (%)           | 10,403 (5.8)    | 33,098 (7.9)   | 19,665 (4.5)   |
| Drinking status                  |                 |                | 67,590 (15.3)  |
| Rare drinkers, N (%)             | 131,484 (73.4)  | 263,452 (70.6) |                |
| Occasional drinkers              | 34,874 (19.5)   | 78,893 (21.1)  |                |
| Daily drinkers ≤ 19 g/day        | 7,372 (4.1)     | 15,676 (4.2)   |                |
| 20–39                            | 3,821 (2.1)     | 10,231 (2.7)   |                |
| 40–59                            | 1,152 (0.6)     | 3,473 (0.9)    |                |
| ≥ 60                             | 528 (0.3)       | 1,425 (0.4)    |                |
| SBP, mmHg                        | 128 ± 18        | 128 ± 18       | 53,966 (12.2)  |
| DBP, mmHg                        | 75 ± 10         | 75 ± 11        | 54,133 (12.3)  |
| MAP, mmHg                        | 92 ± 12         | 93 ± 12        | 54,155 (12.3)  |
| HDL cholesterol, mg/dL           | 65 ± 16         | 66 ± 16        | 347 (0.1)      |
| Hemoglobin A1c, %                | 5.3 ± 0.6       | 5.3 ± 0.6      | 23,159 (5.3)   |
| Uric acid, mg/dL                 | 4.6 ± 1.1       | 4.6 ± 1.1      | 162,546 (36.9) |
| eGFR, ml/min/1.73 m <sup>2</sup> | 75 (64–84)      | 75 (64–89)     | 101,735 (23.1) |
| ≥ 90, N (%)                      | 37,252 (20.8)   | 76,590 (22.6)  |                |
| 60–89                            | 1119,993 (66.9) | 222,241 (65.6) |                |
| 45–59                            | 19,934 (11.1)   | 35,457 (10.5)  |                |
| < 45                             | 2,052 (1.1)     | 4,717 (1.4)    |                |
| Dipstick UP, -, N (%)            | 159,957 (89.2)  | 391,047 (89.9) | 5,543 (1.3)    |
| ±                                | 12,576 (7.0)    | 27,489 (6.3)   |                |
| 1+                               | 4,912 (2.7)     | 12,171 (2.8)   |                |
| 2+                               | 1,423 (0.8)     | 3,494 (0.8)    |                |
| ≥ 3+                             | 363 (0.2)       | 996 (0.2)      |                |
| Hypertension, N (%)              | 47,783 (26.7)   | 119,807 (27.9) | 11,408 (2.6)   |
| Dyslipidemia, N (%)              | 32,678 (18.2)   | 79,342 (18.5)  | 11,281 (2.6)   |
| Diabetes, N (%)                  | 6,754 (3.8)     | 18,261 (4.3)   | 12,533 (2.8)   |
| CVD history, N (%)               | 12,154 (6.8)    | 28,178 (7.6)   | 67,761 (15.4)  |

Mean ± SD; Median (25%–75%)

BMI, body mass index; CVD, cardiovascular disease; DBP, diastolic blood pressure; eGFR, estimated glomerular filtration rate; HDL, high density lipoprotein; MAP, mean arterial pressure; SBP, systolic blood pressure; UP, urinary protein.

P &lt; 0.05 for all variables except body mass index.

**Table S3.** Observational period and numbers of eGFR measurements

|                            | Rare          | Occasional    | Daily<br>≤ 19 g/day | 20–39         | 40–59         | ≥ 60          |
|----------------------------|---------------|---------------|---------------------|---------------|---------------|---------------|
| <b>Men, N = 125,698</b>    |               |               |                     |               |               |               |
| Observational period, year | 1.9 (1.1–2.4) | 2.0 (1.1–2.5) | 1.9 (1.1–2.3)       | 1.9 (1.1–2.2) | 1.9 (1.1–2.2) | 2.0 (1.1–2.6) |
| Measurements of eGFR       |               |               |                     |               |               |               |
| 2 times, N (%)             | 18,014 (46.5) | 14,752 (45.0) | 6,948 (45.6)        | 11,688 (45.3) | 4,819 (47.2)  | 1,368 (46.8)  |
| 3                          | 13,875 (35.8) | 11,879 (36.2) | 6,060 (39.8)        | 10,433 (40.4) | 3,996 (39.1)  | 1,040 (35.6)  |
| 4                          | 6,837 (17.7)  | 6,143 (18.7)  | 2,228 (14.6)        | 3,698 (14.3)  | 1,405 (13.7)  | 515 (17.6)    |
| <b>Women, N = 179,231</b>  |               |               |                     |               |               |               |
| Observational period, year | 2.0 (1.1–2.4) | 1.9 (1.1–2.2) | 1.9 (1.1–2.1)       | 1.9 (1.1–2.2) | 1.9 (1.1–2.2) | 1.9 (1.0–2.3) |
| Measurements of eGFR       |               |               |                     |               |               |               |
| 2 times, N (%)             | 56,755 (43.2) | 16,050 (46.0) | 3,409 (46.2)        | 1,889 (49.4)  | 602 (52.3)    | 288 (54.5)    |
| 3                          | 51,334 (39.0) | 14,401 (41.3) | 3,199 (43.4)        | 1,526 (39.9)  | 427 (37.1)    | 176 (33.3)    |
| 4                          | 23,395 (17.8) | 4,423 (12.7)  | 764 (10.4)          | 406 (10.6)    | 123 (10.7)    | 64 (12.1)     |

Median (25%–75%)  
eGFR, estimated glomerular filtration rate.

**Table S4.** Difference in eGFR slope among alcohol consumption categories

|                                                                                                                 | Difference in eGFR slope, mL/min/1.73 m <sup>2</sup> /year (95% CI) |                  |                         |                       |                     |                       |
|-----------------------------------------------------------------------------------------------------------------|---------------------------------------------------------------------|------------------|-------------------------|-----------------------|---------------------|-----------------------|
|                                                                                                                 | Rare                                                                | Occasional       | Daily, ≤ 19 g/day 20–39 |                       | 40–59               | ≥ 60                  |
| <b>All men, N = 125,698</b>                                                                                     |                                                                     |                  |                         |                       |                     |                       |
| N                                                                                                               | 38,726                                                              | 32,774           | 15,236                  | 25,819                | 10,220              | 2,923                 |
| Model 1                                                                                                         | -0.30 (-0.57, -0.03)*                                               | 0.00 (reference) | 0.24 (-0.12, 0.61)      | 0.11 (-0.20, 0.41)    | -0.16 (-0.59, 0.27) | -1.33 (-2.02, -0.64)* |
| Model 2                                                                                                         | -0.24 (-0.50, 0.02)                                                 | 0.00 (reference) | -0.01 (-0.36, 0.34)     | -0.01 (-0.31, 0.28)   | -0.04 (-0.45, 0.37) | -1.01 (-1.66, -0.35)* |
| Model 3                                                                                                         | -0.24 (-0.50, 0.01)                                                 | 0.00 (reference) | 0.01 (-0.34, 0.36)      | -0.01 (-0.30, 0.28)   | -0.07 (-0.48, 0.33) | -0.96 (-1.62, -0.31)* |
| Model 4                                                                                                         | -0.32 (-0.56, -0.07)*                                               | 0.00 (reference) | -0.06 (-0.39, 0.27)     | -0.16 (-0.43, 0.12)   | -0.09 (-0.47, 0.30) | -0.82 (-1.44, -0.21)* |
| Model 5                                                                                                         | -0.33 (-0.57, -0.09)*                                               | 0.00 (reference) | -0.06 (-0.39, 0.26)     | -0.16 (-0.43, 0.12)   | -0.08 (-0.47, 0.30) | -0.79 (-1.40, -0.17)* |
| <b>Men with ≥ 3 measurements of eGFR during observational period, N = 68,109</b>                                |                                                                     |                  |                         |                       |                     |                       |
| N                                                                                                               | 20,712                                                              | 18,022           | 8,288                   | 14,131                | 5,401               | 1,555                 |
| Model 1                                                                                                         | -0.67 (-1.20, -0.14)*                                               | 0.00 (reference) | 0.16 (-0.56, 0.87)      | 0.02 (-0.58, 0.62)    | -0.03 (-0.87, 0.82) | -1.90 (-3.31, -0.50)* |
| Model 2                                                                                                         | -0.31 (-0.81, 0.20)                                                 | 0.00 (reference) | -0.05 (-0.73, 0.63)     | -0.28 (-0.85, 0.29)   | 0.03 (-0.77, 0.83)  | -1.55 (-2.90, -0.21)* |
| Model 3                                                                                                         | -0.31 (-0.81, 0.19)                                                 | 0.00 (reference) | -0.04 (-0.72, 0.64)     | -0.27 (-0.84, 0.29)   | -0.04 (-0.84, 0.76) | -1.57 (-2.90, -0.23)* |
| Model 4                                                                                                         | -0.45 (-0.93, 0.02)                                                 | 0.00 (reference) | -0.18 (-0.82, 0.47)     | -0.40 (-0.94, 0.14)   | 0.00 (-0.76, 0.76)  | -1.52 (-2.79, -0.25)* |
| Model 5                                                                                                         | -0.45 (-0.93, 0.02)                                                 | 0.00 (reference) | -0.16 (-0.80, 0.48)     | -0.37 (-0.91, 0.17)   | 0.02 (-0.74, 0.77)  | -1.43 (-2.69, -0.17)* |
| <b>Men without current treatment for hypertension, dyslipidemia, or diabetes, or CVD history, N = 74,276</b>    |                                                                     |                  |                         |                       |                     |                       |
| N                                                                                                               | 23,226                                                              | 19,479           | 8,872                   | 14,773                | 6,047               | 1,879                 |
| Model 1                                                                                                         | -0.31 (-0.64, 0.02)                                                 | 0.00 (reference) | 0.20 (-0.25, 0.65)      | -0.15 (-0.53, 0.23)   | -0.38 (-0.90, 0.14) | -1.21 (-2.04, -0.39)* |
| Model 2                                                                                                         | -0.30 (-0.62, 0.01)                                                 | 0.00 (reference) | -0.13 (-0.56, 0.29)     | -0.29 (-0.65, 0.07)   | -0.39 (-0.88, 0.11) | -1.08 (-1.87, -0.29)* |
| Model 3                                                                                                         | -0.30 (-0.62, 0.01)                                                 | 0.00 (reference) | -0.12 (-0.54, 0.31)     | -0.29 (-0.66, 0.07)   | -0.40 (-0.90, 0.10) | -1.10 (-1.88, -0.31)* |
| Model 4                                                                                                         | -0.37 (-0.67, -0.07)*                                               | 0.00 (reference) | -0.16 (-0.57, 0.24)     | -0.44 (-0.78, -0.10)* | -0.40 (-0.87, 0.07) | -0.98 (-1.73, -0.23)* |
| <b>All women, N = 179,231</b>                                                                                   |                                                                     |                  |                         |                       |                     |                       |
| N                                                                                                               | 131,484                                                             | 34,874           | 7,372                   | 3,821                 | 1,152               | 528                   |
| Model 1                                                                                                         | -0.34 (-0.57, -0.11)*                                               | 0.00 (reference) | -0.16 (-0.68, 0.36)     | 0.32 (-0.35, 0.99)    | -0.18 (-1.33, 0.98) | 0.50 (-1.10, 2.09)    |
| Model 2                                                                                                         | -0.30 (-0.52, -0.07)*                                               | 0.00 (reference) | -0.19 (-0.69, 0.31)     | 0.24 (-0.40, 0.89)    | 0.09 (-1.02, 1.21)  | 0.61 (-0.93, 2.15)    |
| Model 3                                                                                                         | -0.30 (-0.52, -0.07)*                                               | 0.00 (reference) | -0.21 (-0.70, 0.29)     | 0.26 (-0.39, 0.90)    | 0.09 (-1.02, 1.20)  | 0.49 (-1.04, 2.03)    |
| Model 4                                                                                                         | -0.25 (-0.46, -0.03)*                                               | 0.00 (reference) | -0.17 (-0.64, 0.31)     | 0.45 (-0.16, 1.07)    | 0.19 (-0.88, 1.25)  | 0.72 (-0.75, 2.19)    |
| Model 5                                                                                                         | -0.25 (-0.47, -0.04)*                                               | 0.00 (reference) | -0.17 (-0.64, 0.31)     | 0.47 (-0.15, 1.08)    | 0.20 (-0.86, 1.26)  | 0.74 (-0.73, 2.20)    |
| <b>Women with ≥ 3 measurements of eGFR during observational period, N = 100,238</b>                             |                                                                     |                  |                         |                       |                     |                       |
| N                                                                                                               | 74,729                                                              | 18,824           | 3,963                   | 1,932                 | 550                 | 240                   |
| Model 1                                                                                                         | -0.93 (-1.38, -0.48)*                                               | 0.00 (reference) | -0.04 (-1.05, 0.98)     | 0.36 (-0.98, 1.69)    | -0.81 (-3.22, 1.60) | 1.98 (-1.24, 5.21)    |
| Model 2                                                                                                         | -0.47 (-0.90, -0.03)*                                               | 0.00 (reference) | -0.14 (-1.13, 0.84)     | 0.08 (-1.20, 1.37)    | -0.31 (-2.64, 2.02) | 2.44 (-0.68, 5.55)    |
| Model 3                                                                                                         | -0.48 (-0.91, -0.05)*                                               | 0.00 (reference) | -0.20 (-1.18, 0.78)     | 0.11 (-1.17, 1.39)    | -0.40 (-2.72, 1.93) | 2.23 (-0.87, 5.33)    |
| Model 4                                                                                                         | -0.53 (-0.95, -0.12)*                                               | 0.00 (reference) | -0.33 (-1.27, 0.60)     | 0.50 (-0.73, 1.73)    | -0.10 (-2.32, 2.12) | 2.29 (-0.69, 5.26)    |
| Model 5                                                                                                         | -0.55 (-0.97, -0.14)*                                               | 0.00 (reference) | -0.35 (-1.29, 0.59)     | 0.48 (-0.75, 1.70)    | -0.11 (-2.33, 2.11) | 2.28 (-0.69, 5.25)    |
| <b>Women without current treatment for hypertension, dyslipidemia, or diabetes, or CVD history, N = 109,222</b> |                                                                     |                  |                         |                       |                     |                       |
| N                                                                                                               | 77,672                                                              | 22,753           | 5,004                   | 2,583                 | 835                 | 375                   |
| Model 1                                                                                                         | -0.36 (-0.64, -0.08)*                                               | 0.00 (reference) | -0.09 (-0.70, 0.51)     | 0.33 (-0.45, 1.11)    | -0.40 (-1.73, 0.92) | 0.43 (-1.36, 2.22)    |
| Model 2                                                                                                         | -0.28 (-0.55, -0.02)*                                               | 0.00 (reference) | -0.11 (-0.69, 0.48)     | 0.36 (-0.39, 1.11)    | -0.24 (-1.51, 1.04) | 0.65 (-1.07, 2.38)    |
| Model 3                                                                                                         | -0.28 (-0.55, -0.01)*                                               | 0.00 (reference) | -0.11 (-0.70, 0.47)     | 0.38 (-0.37, 1.13)    | -0.23 (-1.50, 1.05) | 0.64 (-1.09, 2.36)    |
| Model 4                                                                                                         | -0.26 (-0.52, -0.00)*                                               | 0.00 (reference) | -0.05 (-0.61, 0.51)     | 0.47 (-0.26, 1.19)    | -0.19 (-1.42, 1.04) | 1.08 (-0.58, 2.74)    |

CI, confidence interval; CVD, cardiovascular disease; eGFR, estimated glomerular filtration rate.

\*P for interaction between alcohol consumption category and time &lt; 0.05

Model 1, unadjusted.

Model 2, adjusted for age (year).

Model 3, adjusted for age (year) and dipstick urinary protein (-, ±, 1+, 2+, and ≥ 3+).

---

Model 4, adjusted for covariates in Model 3 and body mass index (kg/m<sup>2</sup>), mean arterial pressure (mmHg), hemoglobin A1c (%), high density lipoprotein cholesterol (mg/dL), uric acid (mg/dL), and current smoking.

Model 5, adjusted for covariates in Model 4 and current treatment for hypertension, dyslipidemia and diabetes, and history of cardiovascular disease.

**Table S5.** Difference in eGFR slope among five categories of alcohol consumption (vs. occasional drinkers, mL/min/1.73 m<sup>2</sup>/year) in 125,698 men and 179,231 women

|                           | Difference in eGFR slope, mL/min/1.73 m <sup>2</sup> /year (95% CI) |                  |                     |                     |                     |
|---------------------------|---------------------------------------------------------------------|------------------|---------------------|---------------------|---------------------|
|                           | Rare                                                                | Occasional       | Daily, ≤ 19 g/day   | 20–39               | ≥ 40                |
| <b>Men, N = 125,698</b>   |                                                                     |                  |                     |                     |                     |
| N                         | 38,726                                                              | 32,774           | 15,236              | 25,819              | 13,123              |
| Model 1                   | -0.30 (-0.57, -0.03)*                                               | 0.00 (reference) | 0.24 (-0.12, 0.61)  | 0.10 (-0.20, 0.41)  | -0.38 (-0.76, 0.01) |
| Model 2                   | -0.24 (-0.50, 0.02)                                                 | 0.00 (reference) | -0.01 (-0.36, 0.34) | -0.01 (-0.31, 0.28) | -0.26 (-0.63, 0.10) |
| Model 3                   | -0.24 (-0.50, 0.01)                                                 | 0.00 (reference) | 0.01 (-0.34, 0.35)  | -0.01 (-0.30, 0.28) | -0.27 (-0.64, 0.09) |
| Model 4                   | -0.32 (-0.56, -0.07)*                                               | 0.00 (reference) | -0.06 (-0.39, 0.27) | -0.16 (-0.43, 0.12) | -0.24 (-0.58, 0.11) |
| Model 5                   | -0.33 (-0.57, -0.09)*                                               | 0.00 (reference) | -0.06 (-0.39, 0.26) | -0.16 (-0.43, 0.12) | -0.23 (-0.57, 0.12) |
| <b>Women, N = 179,231</b> |                                                                     |                  |                     |                     |                     |
| N                         | 131,484                                                             | 34,874           | 7,372               | 3,821               | 1,680               |
| Model 1                   | -0.34 (-0.57, -0.11)*                                               | 0.00 (reference) | -0.16 (-0.68, 0.36) | 0.32 (-0.35, 0.99)  | 0.07 (-0.88, 1.01)  |
| Model 2                   | -0.30 (-0.52, -0.07)*                                               | 0.00 (reference) | -0.19 (-0.69, 0.31) | 0.24 (-0.40, 0.89)  | 0.27 (-0.64, 1.18)  |
| Model 3                   | -0.30 (-0.52, -0.07)*                                               | 0.00 (reference) | -0.21 (-0.70, 0.29) | 0.26 (-0.39, 0.90)  | 0.23 (-0.68, 1.14)  |
| Model 4                   | -0.25 (-0.46, -0.03)*                                               | 0.00 (reference) | -0.17 (-0.64, 0.31) | 0.45 (-0.16, 1.07)  | 0.38 (-0.49, 1.25)  |
| Model 5                   | -0.25 (-0.47, -0.04)*                                               | 0.00 (reference) | -0.17 (-0.64, 0.31) | 0.47 (-0.15, 1.08)  | 0.40 (-0.47, 1.27)  |

CI, confidence interval; eGFR, estimated glomerular filtration rate.

\*P for interaction between alcohol consumption category and time &lt; 0.05

Model 1, unadjusted.

Model 2, adjusted for age (year).

Model 3, adjusted for age (year) and dipstick urinary protein (-, ±, 1+, 2+, and ≥ 3+).

Model 4, adjusted for covariates in Model 3 and body mass index (kg/m<sup>2</sup>), mean arterial pressure (mmHg), hemoglobin A1c (%), high density lipoprotein cholesterol (mg/dL), uric acid (mg/dL), and current smoking.

Model 5, adjusted for covariates in Model 4 and current treatment for hypertension, dyslipidemia and diabetes, and history of cardiovascular disease.

**Table S6.** Alcohol consumption and incidence of  $\geq 30\%$  decline in eGFR in 125,698 men and 179,231 women.

|                                  | Rare               | Occasional       | Daily<br>$\leq 19$ g/day | 20–39              | 40–59              | $\geq 60$          |
|----------------------------------|--------------------|------------------|--------------------------|--------------------|--------------------|--------------------|
| Men, N                           | 38,726             | 32,774           | 15,236                   | 25,819             | 10,220             | 2,923              |
| Observational period, yr         | 2.0 (1.3–2.9)      | 2.0 (1.4–2.9)    | 2.0 (1.3–2.7)            | 2.0 (1.3–2.6)      | 2.0 (1.2–2.6)      | 2.0 (1.4–2.9)      |
| eGFR decline $\geq 30\%$ , N (%) | 544 (1.4)          | 439 (1.3)        | 178 (1.2)                | 370 (1.4)          | 168 (1.6)          | 60 (2.1)           |
| HR (95% CI), model 1             | 1.12 (0.98, 1.28)  | 1.00 (reference) | 0.96 (0.79, 1.16)        | 1.19 (1.03, 1.38)* | 1.43 (1.18, 1.73)* | 1.57 (1.18, 2.09)* |
| model 2                          | 1.09 (0.95, 1.25)  | 1.00 (reference) | 0.91 (0.75, 1.10)        | 1.16 (1.00, 1.25)* | 1.46 (1.21, 1.77)* | 1.74 (1.30, 2.31)* |
| model 3                          | 1.16 (1.02, 1.33)* | 1.00 (reference) | 0.94 (0.78, 1.13)        | 1.10 (0.95, 1.28)  | 1.23 (1.01, 1.48)* | 1.37 (1.03, 1.82)* |
| model 4                          | 1.15 (1.01, 1.33)* | 1.00 (reference) | 0.95 (0.79, 1.15)        | 1.05 (0.90, 1.22)  | 1.13 (0.93, 1.38)  | 1.23 (0.92, 1.64)  |
| model 5                          | 1.17 (1.02, 1.34)* | 1.00 (reference) | 0.95 (0.78, 1.14)        | 1.03 (0.88, 1.20)  | 1.11 (0.91, 1.35)  | 1.21 (0.90, 1.61)  |
| Women, N                         | 131,484            | 34,874           | 7,372                    | 3,821              | 1,152              | 528                |
| Observational period, yr         | 2.0 (1.4–2.8)      | 2.0 (1.3–2.4)    | 2.0 (1.2–2.3)            | 2.0 (1.2–2.3)      | 2.0 (1.2–2.4)      | 2.0 (1.2–2.7)      |
| eGFR decline $\geq 30\%$ , N (%) | 2,757 (2.1)        | 667 (1.9)        | 109 (1.5)                | 75 (2.0)           | 27 (2.3)           | 13 (2.5)           |
| HR (95% CI), model 1             | 0.98 (0.90, 1.08)  | 1.00 (reference) | 0.82 (0.66, 1.02)        | 1.12 (0.87, 1.44)  | 1.19 (0.78, 1.82)  | 1.19 (0.65, 2.15)  |
| model 2                          | 0.96 (0.88, 1.05)  | 1.00 (reference) | 0.82 (0.66, 1.02)        | 1.16 (0.90, 1.50)  | 1.28 (0.83, 1.96)  | 1.30 (0.72, 2.36)  |
| model 3                          | 0.99 (0.90, 1.08)  | 1.00 (reference) | 0.85 (0.68, 1.06)        | 1.12 (0.87, 1.44)  | 1.11 (0.72, 1.69)  | 0.93 (0.51, 1.69)  |
| model 4                          | 0.98 (0.89, 1.08)  | 1.00 (reference) | 0.86 (0.69, 1.07)        | 1.04 (0.81, 1.34)  | 1.00 (0.65, 1.54)  | 0.82 (0.45, 1.50)  |
| model 5                          | 0.97 (0.88, 1.06)  | 1.00 (reference) | 0.86 (0.69, 1.07)        | 1.02 (0.79, 1.32)  | 0.99 (0.64, 1.52)  | 0.80 (0.44, 1.46)  |

Median (25%–75%)

CI, confidence interval; eGFR, estimated glomerular filtration rate; HR, hazard ratio

\* $P < 0.05$

Model 1, unadjusted.

Model 2, adjusted for age (year).

Model 3, adjusted for age (year), dipstick urinary protein (–,  $\pm$ , 1+, 2+, and  $\geq 3+$ ), and eGFR (mL/min/1.73 m<sup>2</sup>).

Model 4, adjusted for covariates in Model 3 and body mass index (kg/m<sup>2</sup>), mean arterial pressure (mmHg), hemoglobin A1c (%), high density lipoprotein cholesterol (mg/dL), uric acid (mg/dL), and current smoking.

Model 5, adjusted for covariates in Model 4 and current treatment for hypertension, dyslipidemia and diabetes, and history of cardiovascular disease.



**Table S7.** Baseline characteristics and outcomes of rare vs. occasional male drinkers (1:1) and rare vs. daily male drinkers with alcohol consumption of  $\geq 60$  g/day (4:1) matched by propensity score.

|                                                           | Rare vs. occasional            |                  | Occasional vs. Daily, $\geq 60$ g/day |                       |
|-----------------------------------------------------------|--------------------------------|------------------|---------------------------------------|-----------------------|
|                                                           | Rare                           | Occasional       | Occasional                            | Daily $\geq 60$ g/day |
| Number                                                    | 28,846                         | 28,846           | 9,825                                 | 2,901                 |
| <b>Baseline characteristics</b>                           |                                |                  |                                       |                       |
| Age, year                                                 | 65 (58–70)                     | 65 (58–69)       | 61 (51–67)                            | 60 (52–65)            |
| BMI, kg/m <sup>2</sup>                                    | 24.1 $\pm$ 3.3                 | 24.0 $\pm$ 3.0   | 24.1 $\pm$ 3.4                        | 24.0 $\pm$ 3.1        |
| Current smokers, N (%)                                    | 6,432 (22.3)                   | 6,481 (22.5)     | 3,878 (39.5)                          | 1,274 (43.9)          |
| SBP, mmHg                                                 | 129 $\pm$ 17                   | 129 $\pm$ 16     | 133 $\pm$ 17                          | 135 $\pm$ 18          |
| DBP, mmHg                                                 | 78 $\pm$ 11                    | 78 $\pm$ 10      | 81 $\pm$ 11                           | 82 $\pm$ 11           |
| MAP, mmHg                                                 | 95 $\pm$ 12                    | 95 $\pm$ 11      | 99 $\pm$ 12                           | 99 $\pm$ 12           |
| HDL cholesterol, mg/dL                                    | 54 $\pm$ 13                    | 54 $\pm$ 12      | 61 $\pm$ 16                           | 64 $\pm$ 17           |
| Hemoglobin A1c, %                                         | 5.4 $\pm$ 0.8                  | 5.4 $\pm$ 0.8    | 5.3 $\pm$ 0.7                         | 5.3 $\pm$ 0.8         |
| Uric acid, mg/dL                                          | 5.9 $\pm$ 1.3                  | 5.9 $\pm$ 1.3    | 6.3 $\pm$ 1.4                         | 6.5 $\pm$ 1.5         |
| eGFR, ml/min/1.73 m <sup>2</sup>                          | 73 (64–84)                     | 73 (64–84)       | 77 (67–88)                            | 78 (69–89)            |
| Dipstick UP, -, N (%)                                     | 23,811 (82.5)                  | 23,863 (82.7)    | 7,844 (79.8)                          | 2,292 (79.0)          |
| ±                                                         | 2,878 (10.0)                   | 2,873 (10.0)     | 1,149 (11.7)                          | 340 (11.7)            |
| 1+                                                        | 1,406 (4.9)                    | 1,391 (4.8)      | 550 (5.6)                             | 176 (6.1)             |
| 2+                                                        | 578 (2.0)                      | 546 (1.9)        | 228 (2.3)                             | 75 (2.6)              |
| ≥ 3+                                                      | 173 (0.6)                      | 173 (0.6)        | 54 (0.5)                              | 18 (0.6)              |
| Hypertension, N (%)                                       | 8,526 (29.6)                   | 8,459 (29.3)     | 3,002 (30.6)                          | 869 (30.0)            |
| Dyslipidemia, N (%)                                       | 3,201 (11.1)                   | 3,131 (10.9)     | 741 (7.5)                             | 198 (6.8)             |
| Diabetes, N (%)                                           | 2,179 (7.6)                    | 2,156 (7.5)      | 612 (6.2)                             | 176 (6.1)             |
| CVD history, N (%)                                        | 3,287 (11.4)                   | 3,260 (11.3)     | 608 (6.2)                             | 167 (5.8)             |
| <b>Outcomes during observational period</b>               |                                |                  |                                       |                       |
| Observational period, yr                                  | 1.9 (1.1–2.5)                  | 2.0 (1.1–2.5)    | 2.0 (1.1, 2.6)                        | 2.0 (1.1, 2.6)        |
| Difference in eGFR slope, ml/min/1.73m <sup>2</sup> /year | -0.43 (-0.73, -0.13)*          | 1.00 (reference) | 1.00 (reference)                      | -0.81 (-1.62, -0.01)* |
| eGFR decline $\geq 30\%$ , N (%)                          | 361 (1.3)                      | 310 (1.1)        | 147 (1.5)                             | 51 (1.8)              |
| Unadjusted HR (95% CI)                                    | 1.18 (1.01, 1.37) <sup>†</sup> | 1.00 (reference) | 1.00 (reference)                      | 1.18 (0.86, 1.62)     |

Mean  $\pm$  SD; Median (25%–75%)

BMI, body mass index; CI, confidence interval; CVD, cardiovascular disease; DBP, diastolic blood pressure; eGFR, estimated glomerular filtration rate; HDL, high density lipoprotein; HR, hazard ratio; MAP, mean arterial pressure; SBP, systolic blood pressure; UP, urinary protein.

\*P for interaction between alcohol consumption category and time &lt; 0.05

<sup>†</sup>P < 0.05
